# Supplementary material for: Meteorite impacts on ancient oceans opened up multiple NH3 production pathways
Source: Royal Society of Chemistry journal article supplement (doi:10.1039/c7cp00870h), 2017-01-01
Supplement: c7cp00870h1.pdf [file c7cp00870h1.pdf]

## **Supplementary Information for “Meteorite Impacts on Ancient Ocean Opened Up Multiple NH<sub>3</sub> Production Pathways”**

Kohei Shimamura<sup>1</sup>, Fuyuki Shimojo<sup>2</sup>, Aiichiro Nakano<sup>3</sup>, and Shigenori Tanaka<sup>1</sup>

*<sup>1</sup>Graduate School of System Informatics, Kobe University, Kobe, 657-8501, Japan*

*<sup>2</sup>Department of Physics, Kumamoto University, Kumamoto 860-8555, Japan*

*<sup>3</sup>Collaboratory for Advanced Computing and Simulations, Department of Physics & Astronomy, Department of Computer Science, Department of Chemical Engineering & Materials Science, and Department of Biological Sciences, University of Southern California, Los Angeles, CA 90089-0242, USA*

## Rough Estimate of Production Amount of NH<sub>3</sub> Using the MSST-AIMD Simulation

### Results

From previous simulation studies,<sup>1-3</sup> time scale of shock compression is assumed to be ~10 ps. In our 6 km/s shock-wave simulation based on the MSST-AIMD, five NH<sub>3</sub> molecules were produced on the surface of Fe<sub>36</sub> slab during 4 ps, *i.e.*, about 0.35 NH<sub>3</sub> molecules are produced per Fe atom during 10 ps. The estimated amount of meteorite accretion  $4 \times 10^{24}$  g during 4.4 to 3.8 billion years ago<sup>4</sup> is also used. Assuming that the whole accretion occurred by ordinary chondrites contained 10 wt.% iron,<sup>5</sup> Fe atoms of about  $1.2 \times 10^{13}$  mol were annually supplied to the early Earth during 4.4 to 3.8 billion years ago. We therefore estimate that NH<sub>3</sub> of about  $7.2 \times 10^7$  tons yr<sup>-1</sup> (or  $4.2 \times 10^{12}$  mol yr<sup>-1</sup>) were produced. It should be noted that the amount is larger than  $1.1 \times 10^7$  tons yr<sup>-1</sup> estimated from the experimental result by Nakazawa *et al.*<sup>6</sup> (whose impact velocity corresponds to that of our 4 km/s shock-wave simulation<sup>6</sup>) and the estimated amount from our 5 km/s shock-wave simulation ( $4.3 \times 10^7$  tons yr<sup>-1</sup>).<sup>6</sup> This implies that shocks with greater impact velocities would provide further increase in the yield if all of them can survive after quenching.

## Another Desorption Process of an NH<sub>3</sub> Fragment in the Dissociative Mechanism

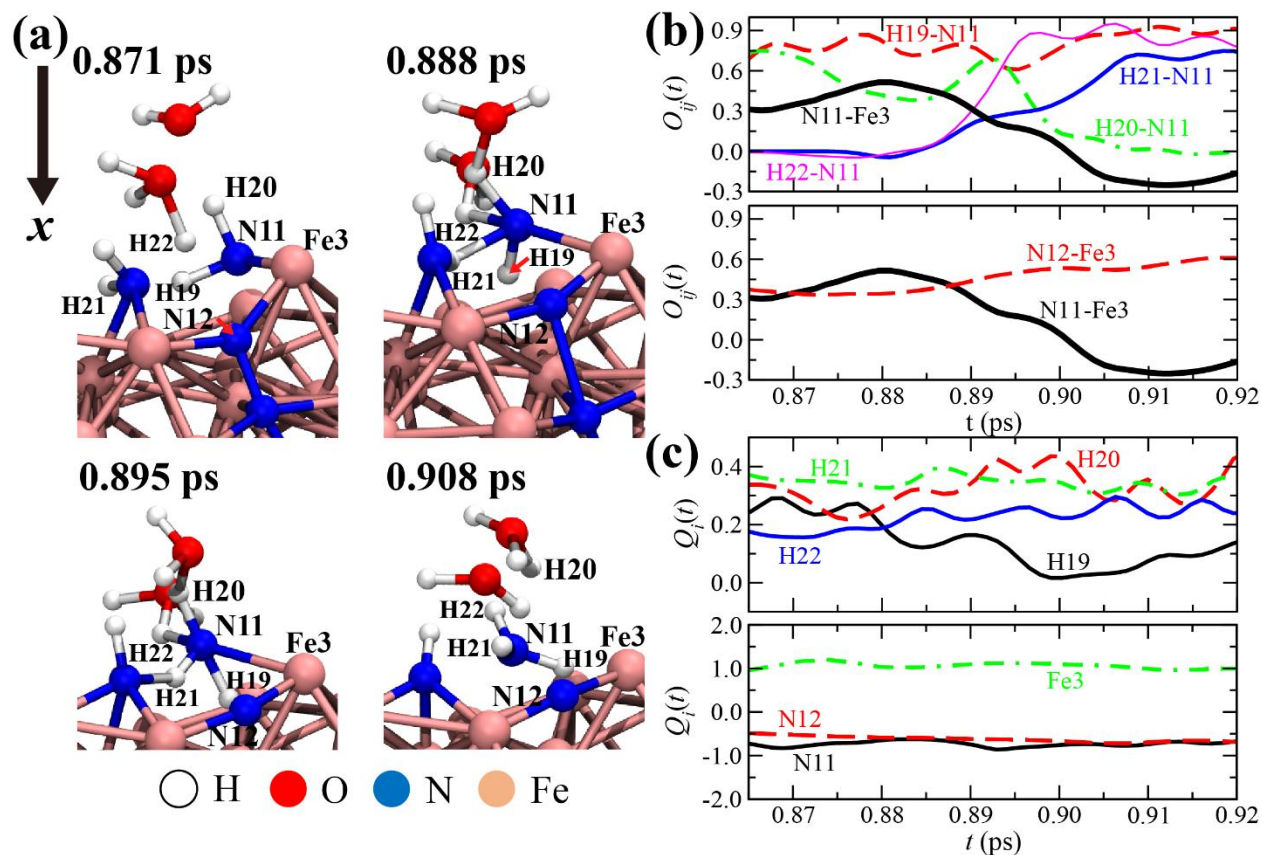

**Figure S1.** (a) Atomistic configurations at 0.871, 0.888, 0.895, and 0.908 ps during the desorption of an NH<sub>3</sub> fragment from the Fe slab surface, where white, red, blue, and pink spheres represent H, O, N, and Fe atoms, respectively. Time evolution of (b) the bond-overlap populations  $O_{ij}(t)$  and (c) the Mulliken charges  $Q_i(t)$  associated with the atoms labeled in (a).

Figure S1 shows another example of the desorption process of an NH<sub>3</sub> fragment in the dissociative mechanism observed in the 6 km/s shock-wave simulation. (It occurred at [a] of Fig. 2(e) in main text.) The time evolution of the atomic configuration is shown in Figure S1(a), where the NH<sub>3</sub> fragment consisting of H19, H21, H22, and N11 was desorbed from Fe3. Figures S1(b) and S1(c) show the time evolution of the bond-overlap populations

$O_{ij}(t)$  and the Mulliken charges  $Q_i(t)$  for specified atoms using the Mulliken bond-overlap population analysis.

At 0.871 ps, two  $\text{NH}_2$  fragments and one  $\text{N}_2$  molecule existed on the Fe slab surface. In addition, one  $\text{H}_3\text{O}^+$  and one  $\text{H}_2\text{O}$  molecule were present near the  $\text{NH}_2$  fragment consisting of H19, H20, and N11, but these would be not important for the desorption of the  $\text{NH}_3$  fragment because they were only involved in exchanging their H atoms via N11. At 0.888 ps, the  $\text{H}_2\text{O}$  molecule and  $\text{H}_3\text{O}^+$  began to interact with the former  $\text{NH}_2$  fragment via H20 and H22, respectively. Subsequently, by proton transfers, N11 obtained H22 instead of releasing H20.

The key atom for the desorption is N12 contained in the  $\text{N}_2$  molecule. At 0.888 ps, the  $\text{N}_2$  molecule was dissociated and then the single N atom N12 was formed. N12 gradually strengthened the bond with Fe3 (see  $O_{\text{N12-Fe3}}(t)$ ) from about 0.88 ps. In contrast to this, the bond strength of N11-Fe3 began to decrease (see  $O_{\text{N11-Fe3}}(t)$ ). This is because electrons from Fe3, which formed bonds with N11, were subsequently involved in the strengthening of bond with N12. Along with increasing  $O_{\text{N12-Fe3}}(t)$ , the bond strength of N22-H11 rapidly increased, and then the  $\text{NH}_3$  fragment consisting of H19, H21, H22, and N11 was desorbed from Fe3 at 0.908 ps ( $O_{\text{N11-Fe3}}(t)$  reached zero). Therefore, it is considered that the N atoms bidentate-coordinated to Fe atoms such as N12 play a role to catalytically support the desorption of  $\text{NH}_3$  fragments from the Fe slab surface.

## References for Supplementary Information

1. D. H. Robertson, D. W. Brenner and C. T. White, Split shock wave from molecular dynamics. *Phys. Rev. Lett.*, 1991, **67**, 3132-3135.
2. K. T. Gahagan, D. S. Moore, D. J. Funk, R. L. Rabie and S. J. Buelow, Measurement of shock wave rise times in metal thin films. *Phys. Rev. Lett.*, 2000, **85**, 3205-3208.
3. K. Kadau, T. C. Germann, P. S. Lomdhal and B. L. Holian, Microscopic view of structural phase transitions induced by shock waves. *Science*, 2002, **296**, 1681-1684.
4. J. Kasting, Bolide Impacts and the Oxidation-State of Carbon in the Earth's Early Atmosphere. *Orig. Life Evol. Biosph.*, 1990, **20**, 199-231.
5. F. Afiattalab and J. T. Wasson, Composition of the metal phases in ordinary chondrites: implications regarding classification and metamorphism. *Geochim. Cosmochim. Ac.*, 1980, **44**, 431-446.
6. K. Shimamura, F. Shimojo, A. Nakano and S. Tanaka, Meteorite Impact-Induced Rapid NH<sub>3</sub> Production on Early Earth: *Ab Initio* Molecular Dynamics Simulation. *Sci. Rep.*, 2016, **6**, 38953.
